# Supplementary material for: The Membrane Steps of Bacterial Cell Wall Synthesis as Antibiotic Targets
Source: PubMed Central journal article supplement (PMC5039524; doi:10.3390/antibiotics5030028), 2016-08-26

# Supplementary Materials: The Membrane Steps of Bacterial Cell Wall Synthesis as Antibiotic Targets

Yao Liu and Eefjan Breukink

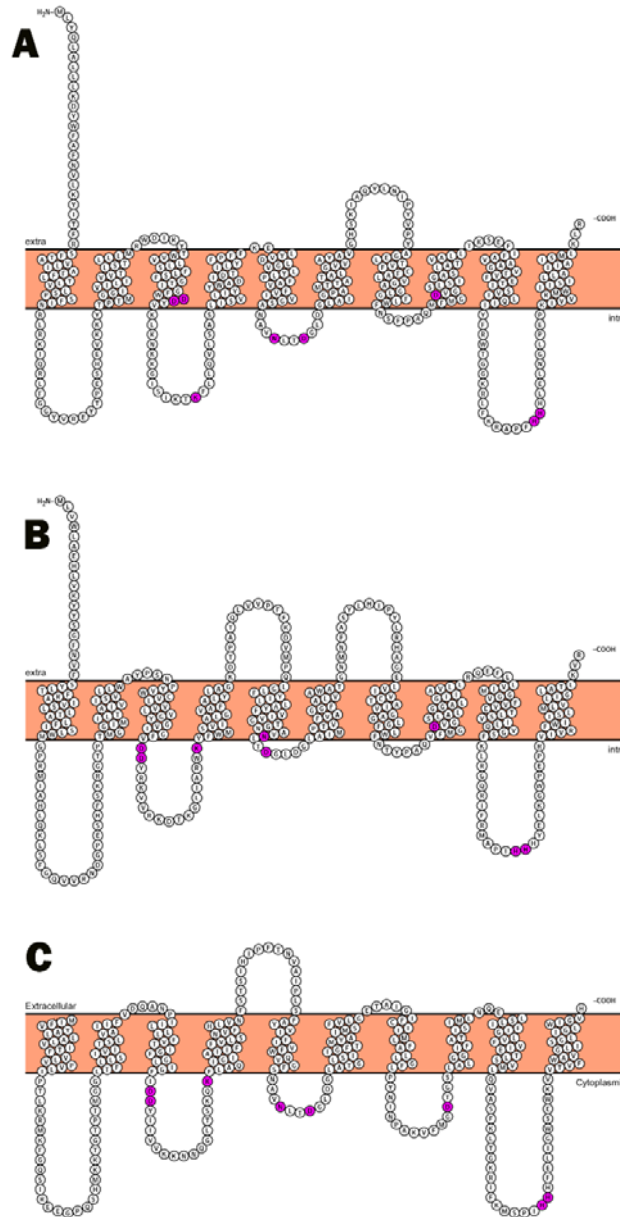

**Figure S1.** Topology maps of (A) *A. aeolicus* MraY, (B) *E. coli* MraY, and (C) *S. aureus* MraY. Highly conserved residues (equivalents of D98, D99, K116, N171, D174, D231, H289 and H290 of *B. subtilis* MraY) are highlighted in pink. The figures are rendered with Protter webservice.

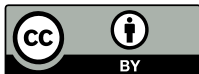

Supplement: antibiotics-05-00028-s001.pdf [file antibiotics-05-00028-s001.pdf]
